# Supplementary material
Source: PubMed Central journal article supplement (PMC1820664)

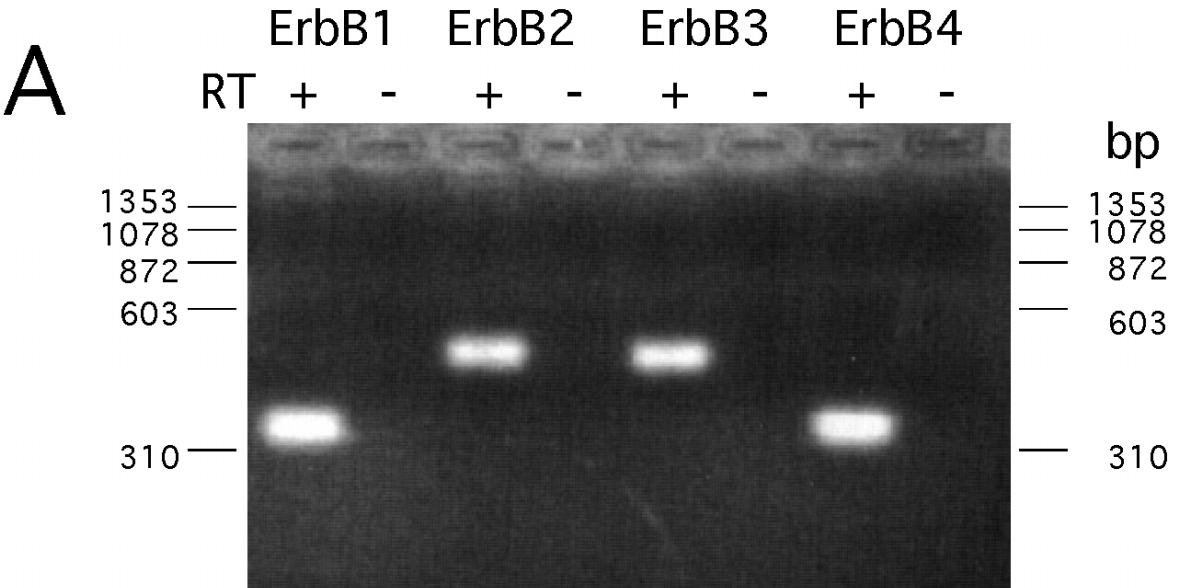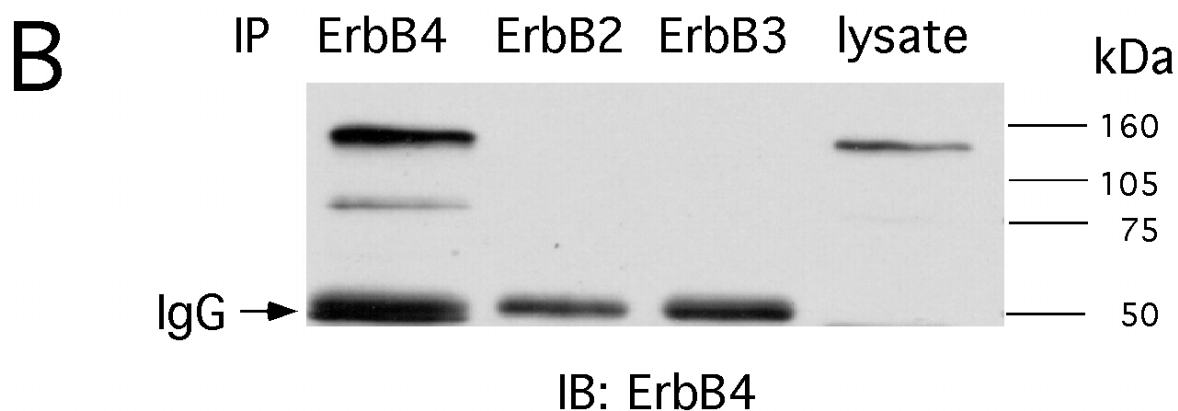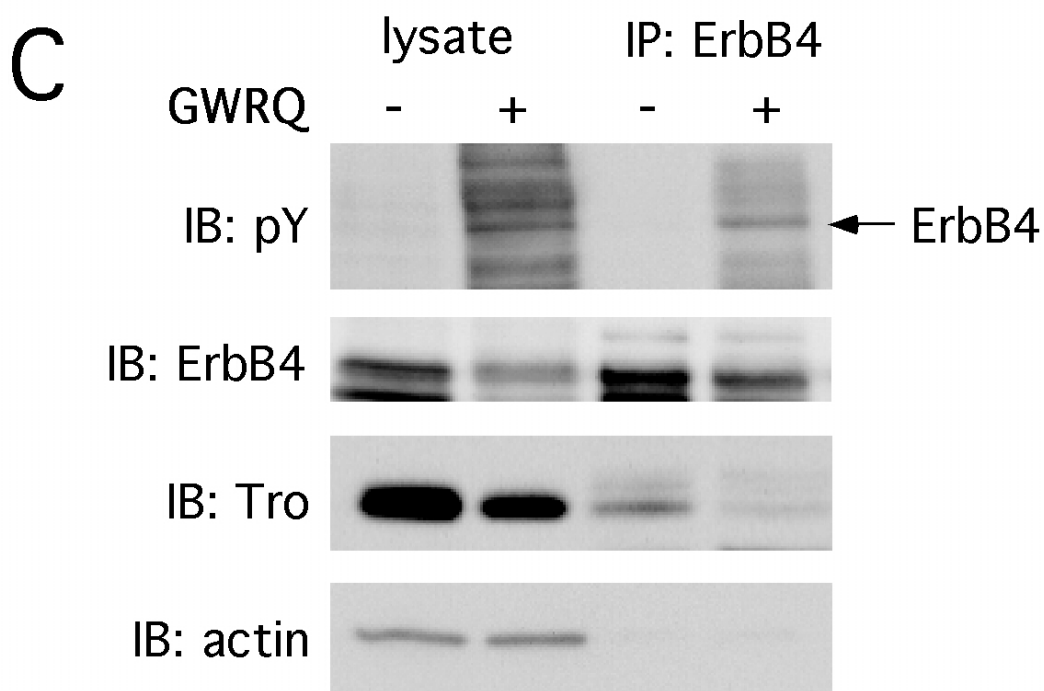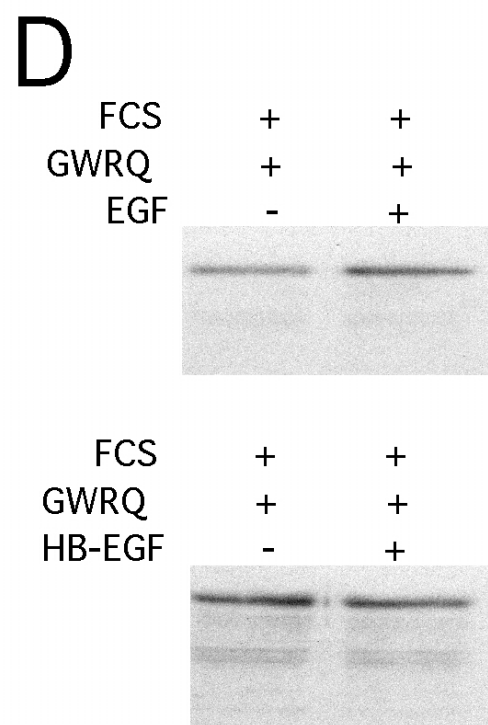

Supplement: pnas_0611516104_4.pdf [file pnas_0611516104_4.pdf]
